# Supplementary material for: Risk factors for cardiometabolic health in Ghana: Cardiometabolic Risks Study Protocol-APTI Project
Source: Frontiers journal article supplement (doi:10.3389/fendo.2024.1337895), 2024-09-04
Supplement: Data_Sheet_1.pdf [file Data_Sheet_1.pdf]

## DATA WORKSHEET MODEL-INSTRUMENT

### PERSONAL INFORMATION

1. Participant identification ( UCC-001) \_\_\_\_\_
2. Current date \_\_\_\_\_
3. Last name \_\_\_\_\_
4. First name \_\_\_\_\_
5. Date of birth (MM/DD/YY)\_\_\_\_\_
6. Cell phone \_\_\_\_\_/ \_\_\_\_\_
7. Email:\_\_\_\_\_

### IDENTIFICATION

8. Participant number (PN)\_\_\_\_\_
9. Year of visit\_\_\_\_\_
10. Age \_\_\_\_\_
11. Sex : Man (0) ☐ Woman (1) ☐
12. Community\_\_\_\_\_
13. Screening site (Put back):
  1. V
  2. W
  3. X
  4. Y
  5. Z

### SOCIAL & DIETARY PRACTICES

#### 14. Marital status:

1. Single ☐
2. Married ☐
3. Widow ☐
4. Separated ☐
5. Divorced ☐

#### 15. Education level (Put back) :

1. No education
2. Basic education (elementary school)
3. Secondary education (high school)
4. Tertiary education (college/university)

#### 16. Profession:

1. Fisherfolks ☐
2. Farmer ☐
3. Government employee ☐
4. Business-person ☐
5. Market workers ☐
6. Student ☐
7. Other ☐ (specify) .....
8. None ☐

17. Household Yearly Income?

**18. Health insurance: 1=Yes / 0=No**

**19. Do you drink alcohol? 1=Yes / 0=No**

If Yes:

Frequency:

1. Less than once a week ☐
2. 1 to 6 days a week ☐
3. Every day ☐

Type of drink:

1. Local brewery ☐
2. Packed beer ☐
3. Packed wine ☐
4. Liquors ☐
5. Other (specify) ☐ \_\_\_\_\_

**20. What source of energy do you use to cook?**

1. Charcoal ☐
2. Wood ☐
3. Gas ☐
4. Electricity ☐
5. Other ☐ (specify) \_\_\_\_\_

**21. In a typical week, on how many days do you eat fruit? (mangoes, oranges, pineapple, banana, etc.)**

Circle one: 0 1 2 3 4 5 6 7 days

**22. How many servings of fruit do you eat on one of those days? \_\_\_\_\_ servings/day**

**23. In a typical week, on how many days do you eat vegetables? (spinach, tomatoes, lettuce, onion, etc.)**

Circle one: 0 1 2 3 4 5 6 7 days

**24. How many servings of vegetables do you eat on one of those days? \_\_\_\_\_ servings/day**

**25. How many times do you consume energy-dense food in a day? (rice, fufu, kenke, banku, re-red, etc.)**

- 0 = never  
1 = once  
2 = twice  
3 = thrice or more

**26. How many servings of these energy-dense foods do you consume at one sitting?**  
\_\_\_\_\_servings/meal

**27. What type of oil or fat is most often used for meal preparation in your household?**

- Vegetable oil
- Palm oil
- Butter or ghee
- Margarine
- Other
- None
- Don't know

**28. How often do you eat in restaurants and pubs?**

1. Less than once a week ☐
2. 1 to 3 days a week ☐
3. 4 to 6 days a week ☐
4. Everyday ☐

**29. What kind of condiments do you add to your food?**

1. Mayonnaise ☐
2. Salt ☐
3. Chili pepper ☐
4. Butter ☐
5. Other ☐ (specify) \_\_\_\_\_
6. None ☐

**30. Do you drink soda? 1=Yes/ 0= No**

If yes

**How often do you drink soda (fanta, malt, sobolo, coca-cola)?**

- 0 = Less than once a week ☐
- 1 = 1 to 3 days a week ☐
- 2 = 4 to 6 days a week ☐
- 3 = Everyday ☐

**31. Do you drink energy drinks? 1 = Yes / 0 = No**

If yes

**How often do you drink energy drinks?**

- 0 = Less than once a week ☐
- 1 = 1 to 3 days a week ☐
- 2 = 4 to 6 days a week ☐
- 3 = Everyday ☐

**32. Do you drink tea? 1=Yes/ 0= No**

If yes

- **How often do you drink tea?**

- 0 = Less than once a week ☐
- 1 = 1 to 3 days a week ☐
- 2 = 4 to 6 days a week ☐
- 3 = Everyday ☐

- **How many teaspoons of sugar/honey do you add to your tea?**

- 1. 1 ☐
- 2. 2 ☐
- 3. 3 ☐
- 4. 4 ☐
- 5. > 4 ☐
- 6. None ☐

**33. Do you drink porridge (koko)? 1=Yes/ 0= No**

If yes

- **How often do you drink koko?**

- 5. Less than once a week ☐
- 6. 1 to 3 days a week ☐
- 7. 4 to 6 days a week ☐
- 8. Everyday ☐

- **How many teaspoons of sugar do you add to your koko?**

- 1. 1 ☐
- 2. 2 ☐
- 3. 3 ☐
- 4. 4 ☐
- 5. >4 ☐
- 6. None ☐

**34. Do you smoke?**

0= No

1= Currently smoke

2= Passive smoking (close contact who smoke)

3= Smoked in the past

If Yes :

Number of cigarettes per day.....

**35. Do you use any other kind of tobacco: 1=Yes / 0=No**

If yes,

- 1. Shisha (hookah) ☐
- 2. Chewing tobacco ☐
- 3. Pipe ☐

4. Other ☐.....

#### **PAST MEDICAL HISTORY**

**36. Has anyone in your family has diabetes? 1=Yes/ 0= No**

If yes:

- 1. Mother ☐
- 2. Father ☐
- 3. Brother ☐
- 4. Sister ☐
- 5. Grandmother
- 6. Grandfather

**37. Has a health professional told you, you have high blood pressure (Hypertension)?  
1=Yes / 0=No**

**38. Are you on blood pressure medication? 1=Yes / 0=No**

**39. Do you have any other medical condition? 1=Yes / 0=No**

If yes:

- 1. Heart failure ☐
- 2. Blood disorder (anemia) ☐
- 3. Liver disease ☐
- 4. Kidney disease ☐
- 5. Other (specify)☐\_\_\_\_\_

#### **SLEEP QUALITY**

1. What time do you go to bed at night?

**Time \_\_ : \_\_ (hours)**

2. How long does it take you to fall asleep? (sleep latency)

**Time \_\_\_\_\_ (minutes)**

3. What time do you wake up in the morning?

**Time \_\_ : \_\_**

4. How many hours of actual sleep do you get each night? (this may be different from the number of hours you spend in bed)

- 1. <5 hours
- 2. 5-6 hours
- 3. 6-7 hours
- 4. 7-8 hours
- 5. >8 hours

**Sleep disturbances: During the past month, how often did you have trouble sleeping in the night because:**

5. You cannot fall asleep within 30 minutes when getting to the bed?

0 = Not during the past month

1 = less than once a week

2 = once or twice a week

3 = three or more times a week

6. You have to wake up to use the bathroom?

0 = Not during the past month

1 = less than once a week

2 = once or twice a week

3 = three or more times a week

7. You wake up suddenly, in the middle of the night?

0 = Not during the past month

1 = less than once a week

2 = once or twice a week

3 = three or more times a week

8. You had a bad dream?

0 = Not during the past month

1 = less than once a week

2 = once or twice a week

3 = three or more times a week

9. You had pain?

0 = Not during the past month

1 = less than once a week

2 = once or twice a week

3 = three or more times a week

10. You felt too cold?

0 = Not during the past month

1 = less than once a week

2 = once or twice a week

3 = three or more times a week

11. You felt too hot?

0 = Not during the past month

1 = less than once a week

2 = once or twice a week

3 = three or more times a week

12. You coughed loudly?

0 = Not during the past month

1 = less than once a week

- 2 = once or twice a week
- 3 = three or more times a week

13. During the past month, how often did you use sleep medications (prescription or OTC)?

- 0 = Not during the past month
- 1 = less than once a week
- 2 = once or twice a week
- 3 = three or more times a week

14. How would you rate your overall sleep quality?

- 1. Very good
- 2. Fairly good
- 3. Fairly bad
- 4. Very bad

**Final PSQI Score:** \_\_\_\_\_

**COHEN PERCEIVED STRESS SCALE (PSS10)**

- 1. In the past month, how often have you been upset because of something that happened unexpectedly?
- 2. In the past month, how often have you felt unable to control the important things in your life?
- 3. In the past month, how often have you felt nervous or stressed?
- 4. In the past month, how often have you found that you could not cope with all the things you had to do?
- 5. In the past month, how often have you been angry because of things that had happened that were out of your control?
- 6. In the past month, how often have you felt that difficulties were piling up so high that you could not overcome them?

- 0 = Never
- 1 = Almost never
- 2 = Sometimes
- 3 = Fairly often
- 4 = Very often

- 7. In the past month, how often have you felt confident about your ability to handle personal problems?
- 8. In the past month, how often have you felt that things were going your way?
- 9. In the past month, how often have you been able to control irritations in your life?
- 10. In the past month, how often have you felt that you were on top of things?

- 0 = Very often
- 1 = fairly often
- 2 = sometimes
- 3 = almost never
- 4 = never

**Final PSS Score:** \_\_\_\_\_

## **LIFESTYLE / PHYSICAL ACTIVITY QUESTIONS**

### **15. What is your usual means of transportation to and from places?**

1. Walking ☐
2. Bicycle ☐
3. Motorbike ☐
4. Bus ☐
5. Private Car ☐
6. Mixture of the above ☐

### **16. On average how much time do you spend walking every day?**

1. Less than 1 hour ☐
2. 1 to 2 hours ☐
3. 3 to 4 hours ☐
4. 5 to 6 hours ☐
5. More than 6 hours ☐

### **17. What kind of work do you do with regards to physical activity?**

1. Mostly sitting (Computer based, shop keepers, drivers) ☐
2. Sitting and frequently walking (Healthcare, teachers, ...) ☐
3. Mostly walking around (security personnel, mail delivery,...) ☐
4. Physical labor (fishing, farming, construction, mechanics,...) ☐

### **18. Do you do sports? 1=Yes / 0=No**

**If yes, How often do you do sports?**

1. Less than once a week ☐
2. 1 to 3 days a week ☐
3. 4 to 6 days a week ☐
4. Every day ☐

#### **• What kind of sports do you do?**

1. Jogging, swimming, cycling ☐
2. Ball/field/net games (Football, basketball, volleyball, tennis, badminton, ...) ☐
3. Dance exercises (gym, jump rope, aerobics,...) ☐
4. Weight lifting ☐
5. Multiple category ☐

#### **• How much time do you spend doing sports?**

1. Less than 30 min ☐
2. 30 min to 1 hour ☐
3. 1 to 2 hours ☐
4. More than 2 hours ☐

## **INTERNATIONAL PHYSICAL ACTIVITY QUESTIONNAIRE**



We are interested in finding out about the kinds of physical activities that people do as part of their everyday lives. The questions will ask you about the time you spent being physically active in the **last 7 days**. Please answer each question even if you do not consider yourself to be an active person. Please think about the activities you do at work, as part of your house and yard work, to get from place to place, and in your spare time for recreation, exercise or sport. Think about all the **vigorous** activities that you did in the **last 7 days**. **Vigorous** physical activities refer to activities that take hard physical effort and make you breathe much harder than normal. Think *only* about those physical activities that you did for at least 10 minutes at a time.

1. During the **last 7 days**, on how many days did you do **vigorous** physical activities like heavy lifting, digging, aerobics, jogging, gym activities, or fast bicycling?  
\_\_\_\_\_ **Days per week**  
\_\_\_\_\_ No vigorous physical activities *Skip to question 3*
2. How much time did you usually spend doing **vigorous** physical activities on one of those days?  
\_\_\_\_\_ **Hours per day**  
\_\_\_\_\_ **Minutes per day**  
\_\_\_\_\_ Don't know/Not sure

**8.0 METs X \_\_\_\_\_ min/day X \_\_\_\_\_ days/week = \_\_\_\_\_ MET min/week**

Think about all the **moderate** activities that you did in the **last 7 days**. **Moderate** activities refer to activities that take moderate physical effort and make you breathe somewhat harder than normal. Think *only* about those physical activities that you did for at least 10 minutes at a time.

3. During the **last 7 days**, on how many days did you do **moderate** physical activities like carrying light loads, bicycling at a regular pace, or doubles tennis? Do not include walking.  
\_\_\_\_\_ **Days per week**  
\_\_\_\_\_ No moderate physical activities *Skip to question*
4. How much time did you usually spend doing **moderate** physical activities on one of those days?  
\_\_\_\_\_ **Hours per day**  
\_\_\_\_\_ **Minutes per day**  
\_\_\_\_\_ Don't know/Not sure

**6.0 METs X \_\_\_\_\_ min/day X \_\_\_\_\_ days/week = \_\_\_\_\_ MET min/week**

Think about the time you spent **walking** in the **last 7 days**. This includes at work and at home, walking to travel from place to place, and any other walking that you have done solely for recreation, sport, exercise, or leisure.

5. During the **last 7 days**, on how many days did you **walk** for at least 10 minutes at a time?  
\_\_\_\_\_ **Days per week**  
\_\_\_\_\_ No walking *Skip to question 7*

6. How much time did you usually spend **walking** on one of those days?

\_\_\_\_\_ **Hours per day**

\_\_\_\_\_ **Minutes per day**

\_\_\_\_\_ Don't know/Not sure

**3.3 METs X \_\_\_\_\_ min/day X \_\_\_\_\_ days/week = \_\_\_\_\_ MET min/week**

The last question is about the time you spent **sitting** on weekdays during the **last 7 days**. Include time spent at work, at home, while doing course work and during leisure time. This may include time spent sitting at a desk, visiting friends, reading, or sitting or lying down to watch television.

7. During the **last 7 days**, how much time did you spend **sitting** on a **week day**?

\_\_\_\_\_ **Hours per day**

\_\_\_\_\_ **Minutes per day**

\_\_\_\_\_ Don't know/Not sure

8. **Continuous score for physical activity:** \_\_\_\_\_ **MET min/week**  
(Total MET min/wk)

9. **Categorical score for physical activity: (Circle one)**

1=Low

2=Moderate

3=High

\*reference: Baldi S., et al. (2013). Influence of Apolipoproteins on the Association between Lipids and Insulin Sensitivity. *Diabetes Care*, 36(12), 4125-4131.

1. Which best describes your activities of your daily life? \_\_\_\_\_

1= **Inactive** - No regular physical activity with a sit down job, including hospitalized patients

2= **Light** – No organized physical activity during leisure time with three to four hours of walking or standing per day

3= **Moderate** – Sporadically involved in recreational activities such as weekend golf or tennis, occasional jogging, swimming, or cycling

4= **Heavy** – Consistent job activities of lifting or stair climbing or participating in recreational/fitness activities such as jogging, swimming or cycling at least 3 times per week for 30 to 60 minutes per session

5= **Vigorous** – Participation in extensive physical activity for 60 minutes or more minutes at least 4 times per week

2. Do you work on the computer every day? (1=Yes/2=No) \_\_\_\_\_

3. Do you watch TV every day? (1=Yes/2=No) \_\_\_\_\_

4. How many hours per day do you watch TV or spend on the computer, combined? \_\_\_\_\_

0 = Zero hours

1 = 0.01 to three hours

2 = 3.01 to six hours

3 = 6.01 to nine hours

4 = More than nine

### **Stunkard Scale - Body Size**

1. Choose your ideal figure for yourself from the following pictures.

Men

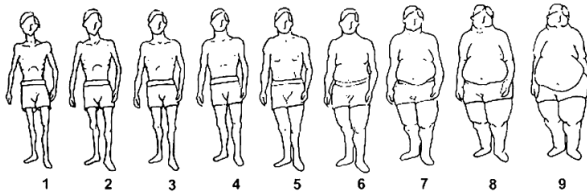

2. Choose the figure that reflects how you think you look.

Men

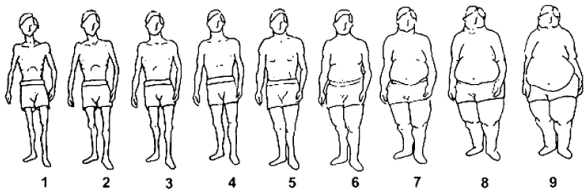

\*reference: Lynch E., et al. (2008). The Relationship Between Body Size Perception and Change in Body Mass Index Over 13 Years. *American Journal of Epidemiology*, 169(7), 857-866.

### **Stunkard Scale - Body Size**

1. Choose your ideal figure for yourself from the following pictures.

Women

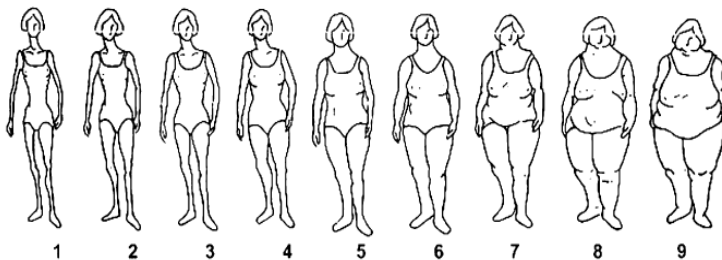

2. Choose the figure that reflects how you think you look.

Women

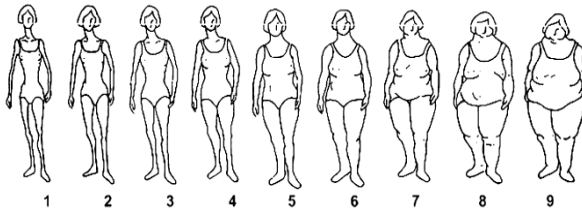

Reference: Lynch E., et al. (2008). The Relationship Between Body Size Perception and Change in Body Mass Index Over 13 Years. *American Journal of Epidemiology*, 169(7), 857-866.

## EARLY LIFE EXPERIENCES

Were you malnourished as a child?

- 0 = No
- 1 = Underfed
- 2 = Well-fed
- 3 = Overfed

Were you overweight as a child (obolo)? **0 = No / 1 = Yes**

How would you describe the socioeconomic status of parents when you were a child?

- 0 = poor
- 1 = middle class
- 2 = rich / upper class

## PHYSICAL EXAM AND LABORATORY INVESTIGATIONS

### 19. Anthropometrics

Weight (Kg):

Height (m):

BMI:

Waist Circumference (WC) in cm: WC 1\_\_\_\_ WC 2\_\_\_\_ WC 3\_\_\_\_ Avg WC (comp gen)\_\_\_\_\_

Hip circumference (HC) in cm: HC 1\_\_\_\_ HC 2\_\_\_\_ HC 3\_\_\_\_ Avg HC (comp gen)\_\_\_\_\_

WHR (comp gen)\_\_\_\_\_

Total body fat: \_\_\_\_\_

Metabolic age: \_\_\_\_\_

### 20. Blood pressure

Systolic blood pressure (mmHg):\_\_\_\_\_

Diastolic blood pressure (mmHg):\_\_\_\_\_

Pulse rate (BPM): \_\_\_\_\_

### 21. Laboratory investigations

1. Glucose at – 15 min\_\_\_\_\_
2. Glucose at 0 min
3. Glucose at 120 min
4. Hemoglobin A1C\_\_\_\_\_%

a. HPLC Method+\_\_\_\_\_

5. Glycated albumin\_\_\_\_%
6. Total albumin (g/L)
7. Plasma insulin at – 15 min\_\_\_\_\_
8. Plasma insulin at 0 min (pmol/L)\_\_\_\_
9. Plasma insulin at 120 min (pmol/L)\_\_\_\_
- 10.Total cholesterol (mmol/L)\_\_\_\_\_
- 11.HDL cholesterol (mmol/L)\_\_\_\_\_
- 12.Triglycerides (mmol/L)\_\_\_\_\_ -
- 13.LDL cholesterol\_\_\_\_\_
- 14.Homocysteine \_\_\_\_\_
- 15.High-sensitivity C-reactive protein \_\_\_\_\_
- 16.Fibrinogen \_\_\_\_\_
- 17.Hemoglobin: \_\_\_\_\_g/dL
- 18.Hematocrit\_\_\_\_\_%
- 19.Hemoglobin electrophoresis:
  - a. HbA
  - b. HbAA
  - c. HbA2
  - d. HbS
  - e. HbC
  - f. Other

## **22. Result of OGTT**

1. Normal glucose tolerance
2. Prediabetes if yes: impaired fasting glucose , glucose intolerance, both
3. Diabetes
